# Supplementary material for: What is better to enhance the solubility of hydrophobic compounds in aqueous solutions: eutectic solvents or ionic liquids?
Source: Royal Society of Chemistry journal article supplement (doi:10.1039/d4su00379a), 2024-01-01
Supplement: d4su00379a1.pdf [file d4su00379a1.pdf]

# What is Better to Enhance the Solubility of Hydrophobic Compounds in Aqueous Solutions: Eutectic Solvents or Ionic Liquids?

*Olga Ferreira<sup>1,2\*</sup>, Liliana P. Silva<sup>3</sup>, Heloisa H.S. Almeida<sup>1,2</sup>, Jordana Benfica<sup>3</sup>, Dinis O.*

*Abranches<sup>3</sup>, Simão P. Pinho<sup>1,2</sup>, João A. P. Coutinho<sup>3</sup>*

<sup>1</sup> Centro de Investigação de Montanha (CIMO), Instituto Politécnico de Bragança, Campus de Santa Apolónia, 5300-253 Bragança, Portugal

<sup>2</sup> Laboratório para a Sustentabilidade e Tecnologia em Regiões de Montanha, Instituto Politécnico de Bragança, Campus de Santa Apolónia, 5300-253 Bragança, Portugal

<sup>3</sup> CICECO - Aveiro Institute of Materials, Department of Chemistry, University of Aveiro, 3810-193 Aveiro, Portugal

**\*Corresponding authors:** Olga Ferreira, E-mail address: [oferreira@ipb.pt](mailto:oferreira@ipb.pt), Phone: + 351 273 303 087 and João A. P. Coutinho, E-mail address: [jcoutinho@ua.pt](mailto:jcoutinho@ua.pt), Phone: +351 234 401 507.

**Table S1** – Solubility in water of the studied solutes.

| Solute         | Temperature (K) | Solubility in water and standard deviation |                    |                                        |                                                                                 |
|----------------|-----------------|--------------------------------------------|--------------------|----------------------------------------|---------------------------------------------------------------------------------|
|                |                 | This work                                  |                    | Literature                             |                                                                                 |
|                |                 | [g/kg solution]                            | [g/L]              | [g/kg solution]                        | [g/L]                                                                           |
| Benzoic acid   | 298.2           | 2.98 ± 0.17                                | 2.97 <sup>a</sup>  | -                                      | 3.34 ± 0.16 <sup>b</sup>                                                        |
| (S)-Hesperetin | 298.2           | 0.0155 ± 0.0034                            | 0.015 <sup>a</sup> | -                                      | 0.00136 <sup>1</sup><br>0.001 <sup>2</sup><br>0.01572 ±<br>0.00058 <sup>3</sup> |
| L-Tryptophan   | 303.2           | -                                          | 13.65 ±<br>0.36    | 13.6 <sup>4</sup><br>17.2 <sup>5</sup> | 14.41 <sup>6</sup><br>16.54 <sup>7</sup>                                        |

<sup>a</sup> The units conversion from [g/kg solution] to [g/L] was calculated considering ideal solution.

<sup>b</sup> Literature average and standard deviation of 26 data points collected from literature.<sup>8</sup>

**Table S2.** Solubility and standard deviation (*s*) of benzoic acid in aqueous solutions of [Ch]Cl:MalA (1:1), and pH of the solutions, at 298.2 K. Standard uncertainties, *u*, are  $u_r(p) = 0.05$ ,  $u(w) = 0.01$  and  $u(\text{pH}) = 0.05$ .

| ES concentration in solute-free weight fraction ( <i>w</i> ) | Solubility (g/kg solution) | ± <i>s</i> (g/kg solution) | Solubility (mol/L)* | pH   |
|--------------------------------------------------------------|----------------------------|----------------------------|---------------------|------|
| 0.00                                                         | 2.98                       | 0.17                       | 0.024               | 2.89 |
| 0.25                                                         | 5.84                       | 0.19                       | 0.050               | 1.21 |
| 0.50                                                         | 9.68                       | 0.09                       | 0.087               | 0.75 |
| 0.75                                                         | 14.30                      | 0.21                       | 0.136               | 0.30 |
| 0.95                                                         | 21.43                      | 0.39                       | 0.214               | 0.00 |

\* The units conversion from [g/kg solution] to [g/L] was calculated considering ideal solution.

**Table S3.** Solubility and standard deviation (*s*) of benzoic acid in aqueous solutions of [Ch]Cl:GlyA (1:1), and pH of the solutions, at 298.2 K. Standard uncertainties, *u*, are  $u_r(p) = 0.05$ ,  $u(w) = 0.01$  and  $u(\text{pH}) = 0.05$ .

| ES concentration in solute-free weight fraction ( <i>w</i> ) | Solubility (g/kg solution) | ± <i>s</i> (g/kg solution) | Solubility (mol/L)* | pH   |
|--------------------------------------------------------------|----------------------------|----------------------------|---------------------|------|
| 0.00                                                         | 2.98                       | 0.17                       | 0.024               | 2.89 |
| 0.25                                                         | 5.13                       | 0.21                       | 0.044               | 1.72 |
| 0.50                                                         | 9.08                       | 0.16                       | 0.081               | 1.39 |
| 0.75                                                         | 15.76                      | 0.76                       | 0.147               | 1.09 |
| 0.95                                                         | 34.46                      | 2.06                       | 0.335               | 0.50 |

\* The units conversion from [g/kg solution] to [g/L] was calculated considering ideal solution.

**Table S4.** Solubility and standard deviation (*s*) of benzoic acid in aqueous solutions of [Chol][Mal], and pH of the solutions, at 298.2 K. Standard uncertainties, *u*, are  $u_r(p) = 0.05$ ,  $u(w) = 0.01$  and  $u(\text{pH}) = 0.05$ .

| IL concentration in solute-free weight fraction ( <i>w</i> ) | Solubility (g/kg solution) | ± <i>s</i> (g/kg solution) | Solubility (mol/L)* | pH   |
|--------------------------------------------------------------|----------------------------|----------------------------|---------------------|------|
| 0.00                                                         | 2.98                       | 0.17                       | 0.024               | 2.89 |
| 0.25                                                         | 10.6                       | 0.06                       | 0.090               | 3.99 |
| 0.50                                                         | 27.6                       | 0.14                       | 0.248               | 4.44 |
| 0.75                                                         | 71.7                       | 2.11                       | 0.679               | 5.21 |
| 0.99                                                         | 187.2                      | 6.86                       | 1.877               | 5.52 |

\* The units conversion from [g/kg solution] to [g/L] was calculated considering ideal solution.

**Table S5.** Solubility and standard deviation ( $s$ ) of benzoic acid in aqueous solutions of [Chol][Gly], and pH of the solutions, at 298.2 K. Standard uncertainties,  $u$ , are  $u_r(p) = 0.05$ ,  $u(w) = 0.01$  and  $u(\text{pH}) = 0.05$ .

| IL concentration in solute-free weight fraction ( $w$ ) | Solubility (g/kg solution) | $\pm s$ (g/kg solution) | Solubility (mol/L)* | pH   |
|---------------------------------------------------------|----------------------------|-------------------------|---------------------|------|
| 0.00                                                    | 2.98                       | 0.17                    | 0.024               | 2.89 |
| 0.25                                                    | 15.8                       | 1.31                    | 0.134               | 4.56 |
| 0.49                                                    | 43.4                       | 1.84                    | 0.387               | 5.04 |
| 0.75                                                    | 249.9                      | 3.38                    | 2.405               | 5.39 |
| 0.99                                                    | 289.3                      | 6.46                    | 2.895               | -    |

\* The units conversion from [g/kg solution] to [g/L] was calculated considering ideal solution.

**Table S6.** Solubility and standard deviation ( $s$ ) of hesperetin in aqueous solutions of [Ch]Cl:MaIA (1:1), and pH of the solutions, at 298.2 K. Standard uncertainties,  $u$ , are  $u_r(p) = 0.05$ ,  $u(w) = 0.01$  and  $u(\text{pH}) = 0.05$ .

| ES concentration in solute-free weight fraction ( $w$ ) | Solubility (g/kg solution) | $\pm s$ (g/kg solution) | Solubility (mol/L)* | pH   |
|---------------------------------------------------------|----------------------------|-------------------------|---------------------|------|
| 0.00                                                    | 0.0155                     | 0.0034                  | 5.10E-05            | 6.05 |
| 0.25                                                    | 0.047                      | 0.006                   | 1.64E-04            | 1.10 |
| 0.50                                                    | 0.356                      | 0.004                   | 1.29E-03            | 0.79 |
| 0.75                                                    | 1.424                      | 0.029                   | 5.47E-03            | 0.29 |
| 0.95                                                    | 5.238                      | 0.226                   | 2.11E-02            | 0.00 |

\* The units conversion from [g/kg solution] to [g/L] was calculated considering ideal solution.

**Table S7.** Solubility and standard deviation ( $s$ ) of hesperetin in aqueous solutions of [Ch]Cl:GlyA (1:1), and pH of the solutions, at 298.2 K. Standard uncertainties,  $u$ , are  $u_r(p) = 0.05$ ,  $u(w) = 0.01$  and  $u(\text{pH}) = 0.05$ .

| ES concentration in solute-free weight fraction ( $w$ ) | Solubility (g/kg solution) | $\pm s$ (g/kg solution) | Solubility (mol/L)* | pH   |
|---------------------------------------------------------|----------------------------|-------------------------|---------------------|------|
| 0.00                                                    | 0.0155                     | 0.0034                  | 5.10E-05            | 6.05 |
| 0.25                                                    | 0.040                      | 0.001                   | 1.37E-04            | 1.71 |
| 0.50                                                    | 0.270                      | 0.020                   | 9.72E-04            | 1.37 |
| 0.75                                                    | 1.382                      | 0.080                   | 5.21E-03            | 1.22 |
| 0.94                                                    | 10.07                      | 1.49                    | 3.94E-02            | 0.58 |

\* The units conversion from [g/kg solution] to [g/L] was calculated considering ideal solution.

**Table S8.** Solubility and standard deviation ( $s$ ) of hesperetin in aqueous solutions of [Chol][Mal], and pH of the solutions, at 298.2 K. Standard uncertainties,  $u$ , are  $u_r(p) = 0.05$ ,  $u(w) = 0.01$  and  $u(\text{pH}) = 0.05$ .

| IL concentration in solute-free weight fraction ( $w$ ) | Solubility (g/kg solution) | $\pm s$ (g/kg solution) | Solubility (mol/L)* | pH   |
|---------------------------------------------------------|----------------------------|-------------------------|---------------------|------|
| 0                                                       | 0.0155                     | 0.0034                  | 5.10E-05            | 6.05 |
| 0.25                                                    | 0.059                      | 0.007                   | 2.04E-04            | 4.07 |
| 0.50                                                    | 0.720                      | 0.015                   | 2.60E-03            | 4.53 |
| 0.75                                                    | 8.759                      | 0.159                   | 3.33E-02            | 5.48 |
| 0.99                                                    | 18.10                      | 0.38                    | 7.23E-02            | 6.86 |

\* The units conversion from [g/kg solution] to [g/L] was calculated considering ideal solution.

**Table S9.** Solubility and standard deviation ( $s$ ) of hesperetin in aqueous solutions of [Chol][Gly], and pH of the solutions, at 298.2 K. Standard uncertainties,  $u$ , are  $u_r(p) = 0.05$ ,  $u(w) = 0.01$  and  $u(\text{pH}) = 0.05$ .

| IL concentration in solute-free weight fraction ( $w$ ) | Solubility (g/kg solution) | $\pm s$ (g/kg solution) | Solubility (mol/L)* | pH   |
|---------------------------------------------------------|----------------------------|-------------------------|---------------------|------|
| 0.00                                                    | 0.0155                     | 0.0034                  | 5.10E-05            | 6.05 |
| 0.25                                                    | 0.026                      | 0.006                   | 8.93E-05            | 4.68 |
| 0.49                                                    | 0.289                      | 0.036                   | 1.04E-03            | 5.32 |
| 0.75                                                    | 1.429                      | 0.022                   | 5.36E-03            | 6.66 |
| 0.99                                                    | 8.46                       | 0.52                    | 3.33E-02            | -    |

\* The units conversion from [g/kg solution] to [g/L] was calculated considering ideal solution.

**Table S10.** Solubility and standard deviation ( $s$ ) of tryptophan in aqueous solutions of [Ch]Cl:MalA (1:1), and pH of the solutions, at 303.2 K. Standard uncertainties,  $u$ , are  $u_r(p) = 0.05$ ,  $u(w) = 0.01$  and  $u(\text{pH}) = 0.05$ .

| ES concentration in solute-free weight fraction ( $w$ ) | Solubility (g/L) | $\pm s$ (g/L) | Solubility (mol/L) | pH   |
|---------------------------------------------------------|------------------|---------------|--------------------|------|
| 0.00                                                    | 13.65            | 0.40          | 0.0668             | 6.41 |
| 0.10                                                    | 50.6             | 2.3           | 0.248              | 2.16 |
| 0.20                                                    | 77.7             | 2.8           | 0.381              | 2.18 |
| 0.30                                                    | 80.1             | 4.1           | 0.392              | 2.09 |
| 0.40                                                    | 89.4             | 5.6           | 0.438              | 1.97 |
| 0.50                                                    | 93.3             | 4.9           | 0.457              | 1.87 |
| 0.60                                                    | 95.9             | 3.0           | 0.470              | 1.80 |
| 0.70                                                    | 90.4             | 7.5           | 0.443              | 1.73 |

**Table S11.** Solubility and standard deviation ( $s$ ) of tryptophan in aqueous solutions of [Ch]Cl:GlyA (1:1), and pH of the solutions, at 303.2 K. Standard uncertainties,  $u$ , are  $u_r(p) = 0.05$ ,  $u(w) = 0.01$  and  $u(\text{pH}) = 0.05$ .

| ES concentration in solute-free weight fraction ( $w$ ) | Solubility (g/L) | $\pm s$ (g/L) | Solubility (mol/L) | pH   |
|---------------------------------------------------------|------------------|---------------|--------------------|------|
| 0.00                                                    | 13.65            | 0.40          | 0.0668             | 6.41 |
| 0.10                                                    | 34.6             | 0.3           | 0.169              | 2.40 |
| 0.20                                                    | 55.6             | 2.9           | 0.272              | 2.35 |
| 0.30                                                    | 73.0             | 9.6           | 0.357              | 2.42 |
| 0.40                                                    | 93.1             | 7.9           | 0.456              | 2.59 |
| 0.50                                                    | 94.8             | 5.1           | 0.464              | 2.64 |
| 0.60                                                    | 90.0             | 3.0           | 0.441              | 2.68 |
| 0.70                                                    | 79.0             | 2.7           | 0.387              | 2.53 |

**Table S12.** Solubility and standard deviation ( $s$ ) of tryptophan in aqueous solutions of [Chol][Mal], and pH of the solutions, at 303.2 K. Standard uncertainties,  $u$ , are  $u_r(p) = 0.05$ ,  $u(w) = 0.01$  and  $u(\text{pH}) = 0.05$ .

| IL concentration in solute-free weight fraction ( $w$ ) | Solubility (g/L) | $\pm s$ (g/L) | Solubility (mol/L) | pH   |
|---------------------------------------------------------|------------------|---------------|--------------------|------|
| 0.00                                                    | 13.65            | 0.40          | 0.0668             | 6.41 |
| 0.10                                                    | 23.2             | 0.1           | 0.113              | 4.05 |
| 0.20                                                    | 32.8             | 0.0           | 0.160              | 4.15 |
| 0.30                                                    | 43.3             | 0.1           | 0.212              | 4.31 |
| 0.40                                                    | 49.9             | 0.1           | 0.244              | 4.47 |
| 0.50                                                    | 54.8             | 2.3           | 0.268              | 5.10 |
| 0.60                                                    | 54.2             | 0.1           | 0.265              | 4.97 |
| 0.70                                                    | 56.6             | 1.0           | 0.277              | 5.80 |
| 0.80                                                    | 64.9             | 7.2           | 0.318              | 6.32 |

**Table S13.** Solubility and standard deviation ( $s$ ) of tryptophan in aqueous solutions of [Chol][Gly], and pH of the solutions, at 303.2 K. Standard uncertainties,  $u$ , are  $u_r(p) = 0.05$ ,  $u(w) = 0.01$  and  $u(\text{pH}) = 0.05$ .

| IL concentration in solute-free weight fraction ( $w$ ) | Solubility (g/L) | $\pm s$ (g/L) | Solubility (mol/L) | pH   |
|---------------------------------------------------------|------------------|---------------|--------------------|------|
| 0.00                                                    | 13.65            | 0.40          | 0.0668             | 6.41 |
| 0.10                                                    | 20.4             | 0.03          | 0.100              | 4.44 |
| 0.20                                                    | 25.1             | 0.02          | 0.123              | 4.56 |
| 0.30                                                    | 30.6             | 0.2           | 0.150              | 4.73 |
| 0.40                                                    | 35.4             | 0.1           | 0.173              | 4.93 |
| 0.50                                                    | 39.6             | 0.1           | 0.194              | 5.26 |
| 0.60                                                    | 44.9             | 3.7           | 0.220              | 5.63 |
| 0.70                                                    | 56.3             | 4.7           | 0.276              | 6.04 |

**Table S14.** pH of the aqueous solutions of the ES and IL studied in this work, measured at 303.2 K. Standard uncertainties,  $u$ , are  $u_r(p) = 0.05$ ,  $u(w) = 0.01$  and  $u(\text{pH}) = 0.05$ .

| [Chol][Gly]     |      | [Chol][Mal]     |      | [Ch]Cl:GlyA     |      | [Ch]Cl:MalA     |       |
|-----------------|------|-----------------|------|-----------------|------|-----------------|-------|
| $w_{\text{IL}}$ | pH   | $w_{\text{IL}}$ | pH   | $w_{\text{ES}}$ | pH   | $w_{\text{ES}}$ | pH    |
| 0.10            | 4.51 | 0.10            | 4.07 | 0.11            | 1.74 | 0.10            | 1.47  |
| 0.20            | 4.60 | 0.21            | 4.16 | 0.20            | 1.51 | 0.21            | 1.23  |
| 0.30            | 4.79 | 0.31            | 4.24 | 0.32            | 1.39 | 0.31            | 1.01  |
| 0.40            | 5.01 | 0.41            | 4.47 | 0.41            | 1.28 | 0.41            | 0.86  |
| 0.50            | 5.26 | 0.50            | 4.69 | 0.51            | 1.19 | 0.50            | 0.71  |
| 0.60            | 5.69 | 0.60            | 4.96 | 0.59            | 0.97 | 0.60            | 0.45  |
| 0.70            | 6.26 | 0.70            | 5.27 | 0.71            | 0.89 | 0.70            | 0.27  |
| 0.80            | 6.85 | 0.80            | 5.89 | 0.81            | 0.75 | 0.80            | 0.06  |
| 0.89            | 7.51 | 0.90            | 6.46 | 0.90            | 0.69 | 0.90            | -0.34 |

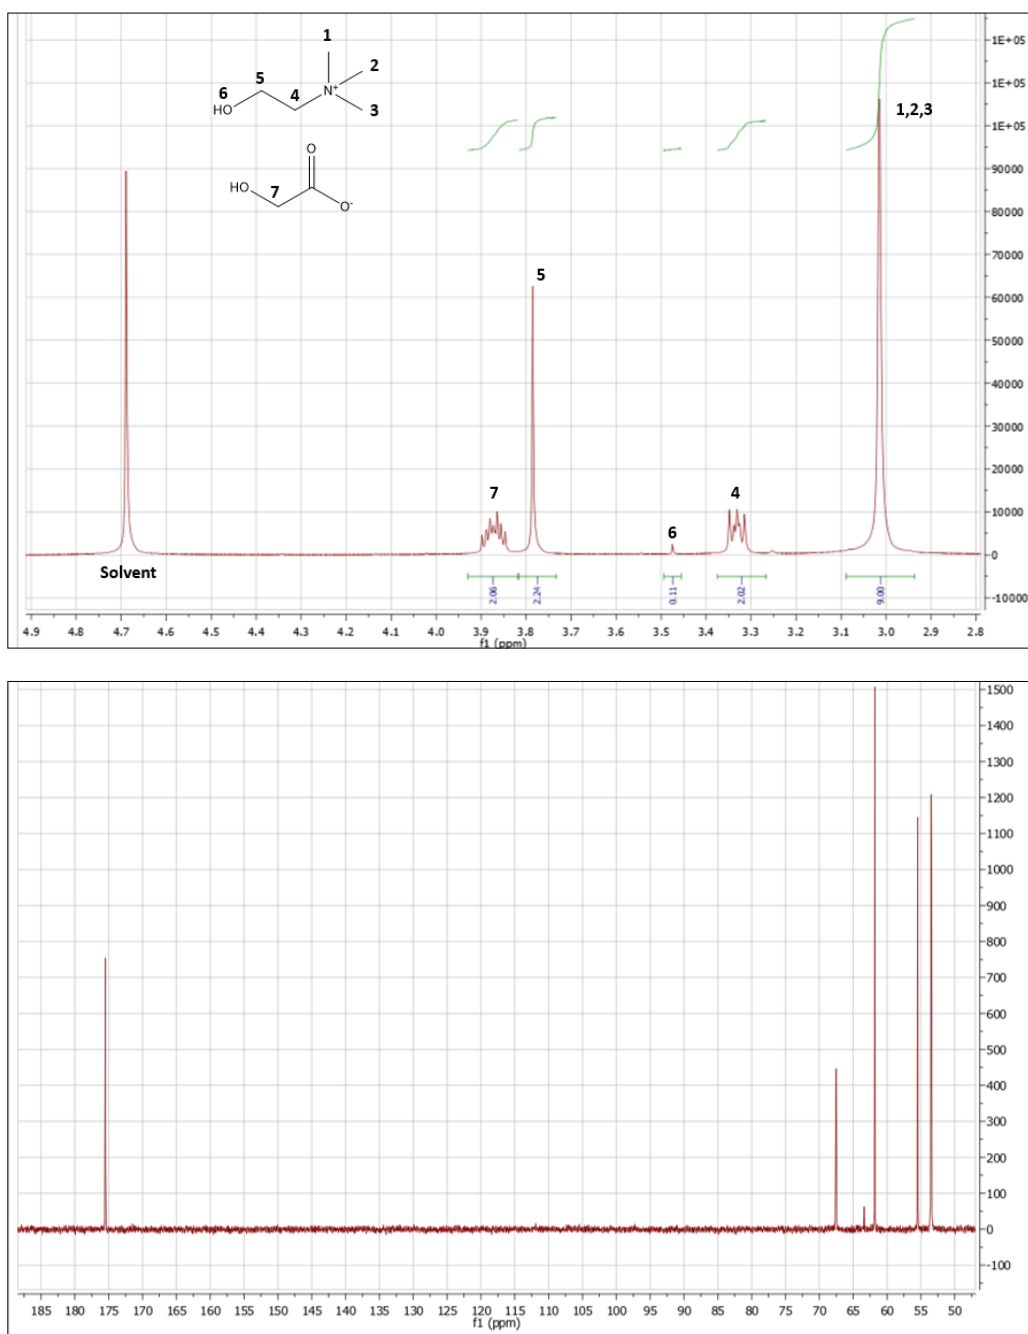

**Figure S1.** <sup>1</sup>H and <sup>13</sup>C-NMR spectra of choline glycolate in D<sub>2</sub>O as solvent.

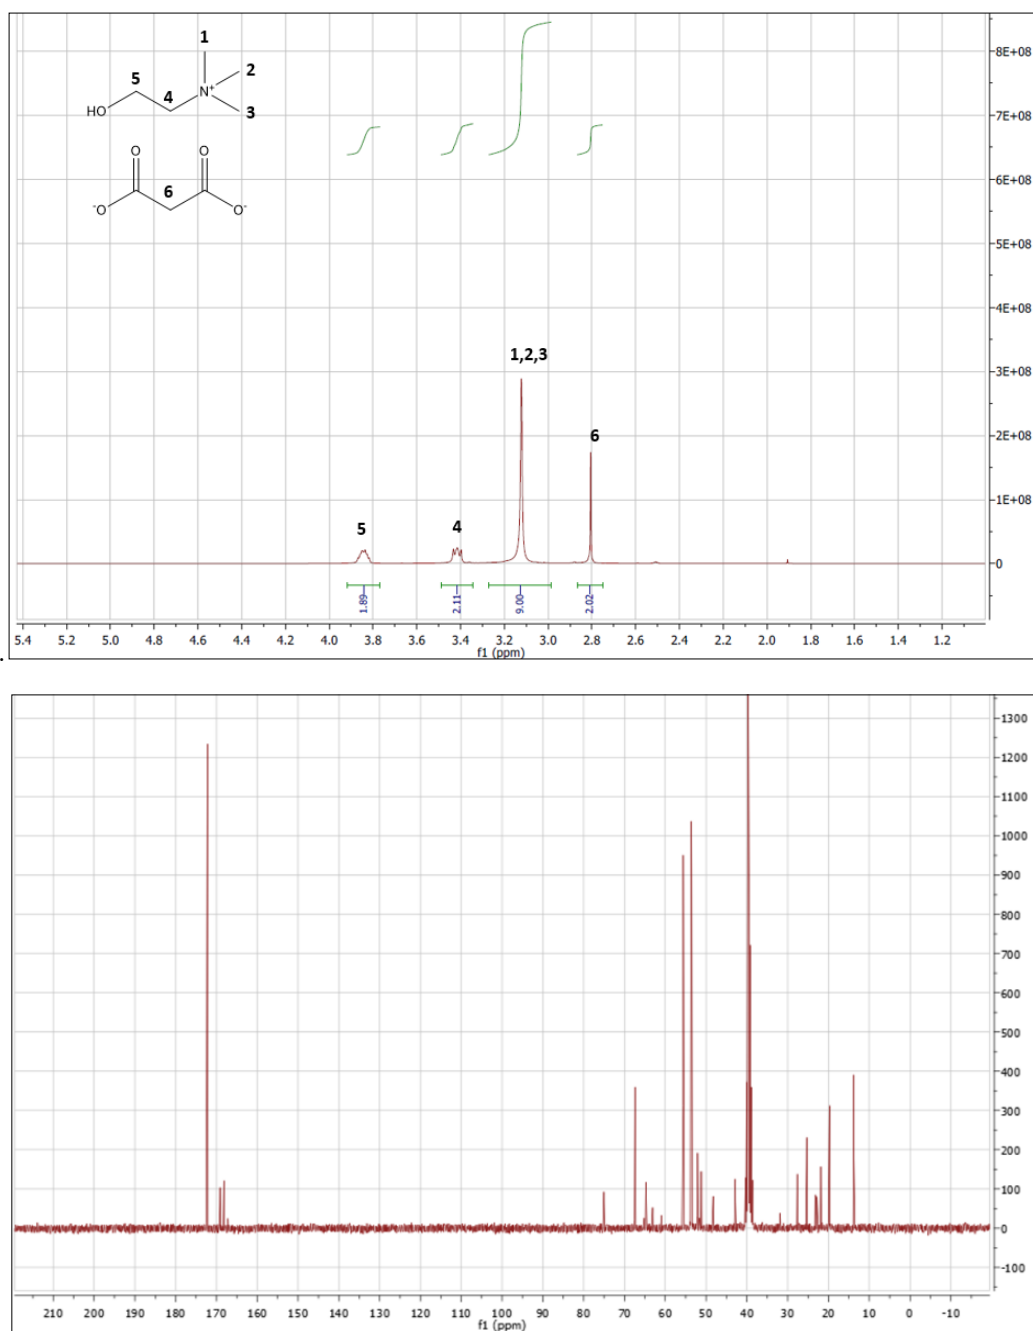

**Figure S2.** <sup>1</sup>H and <sup>13</sup>C-NMR spectra of choline malonate in DMSO as solvent.

## References

- (1) Liu, L.; Chen, J. Solubility of Hesperetin in Various Solvents from (288.2 to 323.2) K. *Journal of Chemical and Engineering Data* **2008**, *53* (7), 1649–1650. <https://doi.org/10.1021/jc800078j>.
- (2) Tommasini, S.; Calabrò, M. L.; Stancanelli, R.; Donato, P.; Costa, C.; Catania, S.; Villari, V.; Ficarra, P.; Ficarra, R. The Inclusion Complexes of Hesperetin and Its 7-Rhamnoglucoside with (2-Hydroxypropyl)- $\beta$ -Cyclodextrin. *Journal of Pharmaceutical and Biomedical Analysis* **2005**, *39* (3–4), 572–580. <https://doi.org/10.1016/j.jpba.2005.05.009>.
- (3) Srirangam, R.; Majumdar, S. Passive Asymmetric Transport of Hesperetin across Isolated Rabbit Cornea. *International Journal of Pharmaceutics* **2010**, *394* (1–2). <https://doi.org/10.1016/j.ijpharm.2010.04.036>.
- (4) Sasahara, K.; Uedaira, H. Solubility of Amino Acids in Aqueous Poly (Ethylene Glycol) Solutions. *Colloid & Polymer Science* **1993**, *271* (11), 1035–1041. <https://doi.org/10.1007/BF00659292>.
- (5) Zhu, W.; Fan, Y.; Xu, Q.; Liu, X.; Heng, B.; Yang, W.; Hu, Y. Saturated Solubility and Thermodynamic Evaluation of L-Tryptophan in Eight Pure Solvents and Three Groups of Binary Mixed Solvents by the Gravimetric Method at  $T = 278.15$ – $333.15$  K. *Journal of Chemical & Engineering Data* **2019**, *64* (9), 4154–4168. <https://doi.org/10.1021/acs.jced.9b00562>.
- (6) Bull, H. B.; Breese, K.; Swenson, C. A. Solubilities of Amino Acids. *Biopolymers* **1978**, *17* (4), 1091–1100. <https://doi.org/10.1002/bip.1978.360170421>.
- (7) Nogami, H.; Umeyama, H. Effect of Third Component on Water Structure around Tryptophan in Aqueous Solution. *Chemical and Pharmaceutical Bulletin* **1970**, *18* (2), 328–334. <https://doi.org/10.1248/cpb.18.328>.
- (8) Yalkowsky, S. H.; He, Y.; Jain, P. *Handbook of Aqueous Solubility Data*, 2nd ed.; New York, 2010.
